## RESEARCH ARTICLE

# Denitrifiers, nitrogen-fixing bacteria and N<sub>2</sub>O soil gas flux in high Arctic ice-wedge polygon cryosols

Ianina Altshuler<sup>1,\*</sup>, Jennifer Ronholm<sup>2,3</sup>, Alice Layton<sup>4</sup>, Tullis C. Onstott<sup>5</sup>, Charles W. Greer<sup>1,6</sup> and Lyle G. Whyte<sup>1</sup>

<sup>1</sup>Department of Natural Resource Sciences, Faculty of Agricultural and Environmental Sciences, Macdonald Campus, McGill University, 21,111 Lakeshore Rd, Ste Anne-de-Bellevue, QC, H9X 3V9, Canada, <sup>2</sup>Department of Food Science and Agricultural Chemistry, Faculty of Agricultural and Environmental Sciences, Macdonald Campus, McGill University, 21,111 Lakeshore Ste Anne-de-Bellevue, QC, H9X 3V9, Canada, <sup>3</sup>Department of Animal Science, Faculty of Agricultural and Environmental Sciences, Macdonald Campus, McGill University, 21,111 Lakeshore Ste Anne-de-Bellevue, QC, H9X 3V9, Canada, <sup>4</sup>Center for Environmental Biotechnology, University of Tennessee – Knoxville, 676 Dabney-Buehler Hall, 1416 Circle Drive, TN 37996-1605, USA, <sup>5</sup>Geomicrobiology, Geosciences, Princeton University, Princeton, NJ 08544, USA and <sup>6</sup>National Research Council of Canada, 6100 Royalmount Avenue, Montreal, QC, H4P 2R2, Canada

\*Corresponding author: Department of Natural Resource Sciences, Faculty of Agricultural and Environmental Sciences, Macdonald Campus, McGill University, 21,111 Lakeshore Rd, Ste Anne-de-Bellevue, QC, H9X 3V9, Canada. E-mail: [ianina.altshuler@mail.mcgill.ca](mailto:ianina.altshuler@mail.mcgill.ca)

**One sentence summary:** An active community of denitrifying and nitrogen-fixing bacteria is associated with differential N<sub>2</sub>O soil gas fluxes in high Arctic ice-wedge polygon cryosols.

Editor: Max Hagblom

<sup>†</sup>Ianina Altshuler, <http://orcid.org/0000-0003-2235-1664>

## ABSTRACT

Climate warming and subsequent permafrost thaw may result in organic carbon and nutrient stores being metabolized by microbial communities, resulting in a positive feedback loop of greenhouse gas (GHG) soil emissions. As the third most important GHG, understanding nitrous oxide (N<sub>2</sub>O) flux in Arctic mineral ice-wedge polygon cryosols and its relationship to the active microbial community is potentially a key parameter for understanding future GHG emissions and climatic warming potential. In the present study, metatranscriptomic analyses of active layer Arctic cryosols, at a representative ice-wedge polygon site, identified active nitrogen-fixing and denitrifying bacteria that included members of Rhizobiaceae, Nostocaceae, Cyanothecaceae, Rhodobacteraceae, Burkholderiaceae, Chloroflexaceae, Azotobacteraceae and Ectothiorhodospiraceae. Unique microbial assemblages with higher proportion of Rhodobacteriales and Rhocyclales were identified by targeted functional gene sequencing at locations with higher ( $P = 0.053$ ) N<sub>2</sub>O emissions in the wetter trough soils compared with the dryer polygon interior soils. This coincided with a higher relative abundance of the denitrification *nirS* gene and higher nitrate/nitrite concentrations in trough soils. The elevated N<sub>2</sub>O flux observed from wetter trough soils compared with drier polygon interior soils is concerning from a climate warming perspective, since the Arctic is predicted to become warmer and wetter.

**Keywords:** Arctic; soil gas flux; nitrous oxide; permafrost; microbial community structure; ice-wedge polygon

Received: 10 October 2018; Accepted: 24 April 2019

© FEMS 2019. All rights reserved. For permissions, please e-mail: [journals.permissions@oup.com](mailto:journals.permissions@oup.com)

## INTRODUCTION

The disproportional rapid warming of the Arctic compared with the rest of the globe due to climatic change is resulting in permafrost thaw and subsequent decomposition of soil organic matter (SOM) (Graversen et al. 2008; Gittel et al. 2014). Arctic soil harbors ~50% of the belowground global organic carbon pool, 88% of which occurs in the permafrost (Tarnocai et al. 2009). Microbial community composition and the availability of decomposers is thought to partially control the decomposition of the SOM (Gittel et al. 2014). Currently, frozen carbon stores are inaccessible to decomposition or are being metabolized at extremely low rates. However, as the Arctic warms and precipitation increases the active soil layer will deepen and these stores may become biologically available to microbial metabolism, resulting in further greenhouse gas (GHG) emissions [carbon dioxide (CO<sub>2</sub>), methane (CH<sub>4</sub>) and nitrous oxide (N<sub>2</sub>O)] via a positive feedback loop (Lawrence et al. 2008; Tarnocai et al. 2009; Schuur et al. 2015; Stackhouse et al. 2015; Mauritz et al. 2017; Salmon et al. 2018).

N<sub>2</sub>O is the third most important greenhouse gas, after CH<sub>4</sub> and CO<sub>2</sub>. It is an ozone-depleting gas with a 100-year global warming potential 298 times higher than that of CO<sub>2</sub> (Davidson and Kanter 2014). Studies on natural and anthropogenic emissions of N<sub>2</sub>O from soils have mainly concentrated on agricultural and tropical soils, as these tend to be well-known sources of N<sub>2</sub>O to the atmosphere (Butterbach-Bahl et al. 2013). However, models based only on agricultural and tropical soils as sources of N<sub>2</sub>O may miss important sources of N<sub>2</sub>O arising from Arctic environments that are disproportionately affected by climate change (Davidson and Kanter 2014).

N<sub>2</sub>O is a by-product of the nitrogen cycle, specifically denitrification in soils, sediments and bodies of water, with soils accounting for ~70% of N<sub>2</sub>O emissions (Butterbach-Bahl et al. 2013). During denitrification, nitrate (NO<sub>3</sub><sup>-</sup>) is stepwise reduced to nitrite (NO<sub>2</sub><sup>-</sup>), nitric oxide (NO), nitrous oxide (N<sub>2</sub>O) and finally to dinitrogen (N<sub>2</sub>) through a series of reactions catalyzed by oxidoreductases. These are encoded by *narGHI* and *napAB* (nitrate reductases), *nirS* and *nirK* (nitrite reductases), *norB* and *norVW* (nitric oxide reductases) and *nosZ* (nitrous oxide reductase). However, depending on abiotic factors such as temperature, pH, water and oxygen availability, carbon to nitrogen ratio, and NO<sub>3</sub><sup>-</sup>/NO<sub>2</sub><sup>-</sup> availability, the denitrification process may be incomplete and result in significant N<sub>2</sub>O production in addition to N<sub>2</sub> (Šimek and Cooper 2002; Dalal and Allen 2008). The ratio of N<sub>2</sub>O to N<sub>2</sub> tends to increase in environments with lower pH and low O<sub>2</sub> availability (Šimek and Cooper 2002; Dalal and Allen 2008). Because of this, topography plays an important factor in driving nitrogen soil-atmosphere exchanges in Arctic terrestrial ecosystems as topography is tightly linked to soil moisture patterns, SOM quality/quantity, soil nutrient content and chemistry, and vegetation (Stewart et al. 2014).

As the Arctic soils warm and microbial activity increases, so too do emissions of CH<sub>4</sub> and CO<sub>2</sub> (Graham et al. 2012). However, the low levels of nitrogen in these soils may limit microbial metabolism and the magnitude of carbon emissions (Sistla, Asao and Schimel 2012). In Arctic permafrost affected soils, nitrogen may enter the system through a combination of permafrost thaw leading to depolymerization of organic nitrogen-containing compounds and ammonia mineralization, atmospheric nitrogen deposition and nitrogen-fixation (Finger et al. 2016; Voigt et al. 2017). Nitrogen-fixation is thought to be a

primary source of nitrogen into terrestrial Arctic ecosystems (Deslippe, Egger and Henry 2005), and plays an important role in N<sub>2</sub>O emissions, with higher nitrogen-fixation rates increasing the rate of nitrogen cycling in Arctic soils (Stewart et al. 2014). The rates of nitrogen-fixation will also likely increase as Arctic soils warm and dampen as a result of climatic change. This is due to higher rates of nitrogen-fixation in wetter and warmer soils, with the estimated optimal temperature for nitrogen-fixation in Arctic ecosystems being between 15–30°C (Hobara et al. 2006; Stewart et al. 2014). This may potentially diminish the nitrogen limitation barrier to microbial growth (Chapin, Bliss and Bledsoe 1991; Stewart, Coxson and Grogan 2011a; Stewart et al. 2014). Indeed, Hultman et al. (2015) gauged the activity of the microbial community in active layer soils and the underlying permafrost by looking at the ratios of RNA:DNA. They reported that the active layer appeared to have a higher RNA:DNA ratio of *nif* genes, suggesting that it harbors a more active community of nitrogen-fixers (Hultman et al. 2015). With the deepening of the active layer, these nitrogen-fixing communities may become significant sources of nitrogen influx to permafrost affected soils and further stimulate microbial metabolism and degradation of frozen carbon stores.

The denitrifying and nitrogen-fixing communities in Arctic polar regions are not well characterized, nor is their effect on GHG emissions, including N<sub>2</sub>O, well understood. Production and emission of N<sub>2</sub>O have been reported in laboratory permafrost core melting experiments (Elberling, Christiansen and Hansen 2010) and cryoturbation (a process resulting in the mixing of soil layers due to repeated freeze-thaw cycles) increases N<sub>2</sub>O emissions (Palmer, Biasi and Horn 2012). Permafrost soils already harbor organisms and genes involved in denitrification, nitrogen-fixation and ammonia assimilation (Yergeau et al. 2010; Hultman et al. 2015). Furthermore, these nitrogen-cycling genes are overall more abundant in the thawed permafrost compared with intact permafrost, including genes for nitrate assimilation and denitrification. However, genes coding for nitrite and nitrous oxide reductases are relatively lower in abundance in the thawed permafrost soils, suggesting a potential for incomplete denitrification and release of N<sub>2</sub>O upon thaw (Elberling, Christiansen and Hansen 2010; Taş et al. 2014).

In this study, we investigated the active microbial community that may be responsible for a potential positive N<sub>2</sub>O gas flux at a mineral (carbon poor) high centered ice-wedge polygon cryosol site in two soil locations in an ice-wedge polygon (IWP) terrain; the drier soils of the polygon interior and the wetter trough soils that overlay the ice-wedges (supplementary Fig. S1 available online). Since other than the moisture content, the soils in troughs and polygon interior soils tend to be abiotically similar (Drew and Tedrow 1962), this terrain provided a natural system in which to explore the effects of moisture content on the microbial community and the N<sub>2</sub>O gas flux. Mineral soils represent the majority of Arctic permafrost cryosols (Hugelius et al. 2014) and approximately 26% of land not covered by ice is composed of polar deserts (Walker et al. 2002). However, the majority of studies to date on GHG flux from Arctic soils, and, specifically N<sub>2</sub>O flux, have focused on carbon-rich organic peat soils (Marushchak et al. 2011; Palmer, Biasi and Horn 2012; Li et al. 2016; Voigt et al. 2016) and these studies do not link N<sub>2</sub>O flux to the microbial community present in the soils. Microbial composition and abundance is one of the main drivers that govern GHG fluxes from soils (Graham et al. 2012); thus, understanding how the underlying microbial community in Arctic soils is

related to  $\text{N}_2\text{O}$  flux and how that community shifts as conditions become warmer and wetter in the Arctic will help in predicting future GHG emissions from Arctic soils. Our approach to link the observed  $\text{N}_2\text{O}$  flux with the active microbial community included metatranscriptome sequencing, quantitative PCR of denitrification gene (*nirS*), functional gene (*nirS*, *nifH*) targeted-amplicon sequencing, soil moisture and nitrogen soil content measurements, and *in situ* soil  $\text{N}_2\text{O}$  gas flux measurements. This study is also the first comprehensive sequencing survey targeting denitrifying and nitrogen-fixing bacteria in mineral cryosols of an Arctic polar desert.

## MATERIALS AND METHODS

### Site and sample collection

The study site is located near the McGill Arctic Research Station (MARS), at Expedition Fjord, Nunavut on Axel Heiberg Island (AHI) in the Canadian high Arctic (coordinates- 79°26'N, 90°46'W). The active soil layer ranges from 60–73 cm in depth during the summer with the top 5 cm at  $9 \pm 0.8^\circ\text{C}$  (Lau et al. 2015). The site is characterized by a high centered ice-wedge polygon terrain. Soil sampling for metatranscriptome sequencing was done in July 2013, the top 5 cm of the active layer surface soils from the trough and polygon interior ( $n = 2$ ) were collected and immediately placed in RNA-Lifeguard Soil Preservation Solution (MoBio) and frozen at  $-20^\circ\text{C}$  to maintain the integrity of RNA in the samples. Soils for functional gene amplicon sequencing (*nirS*, *nifH*), soil nitrogen/ammonia and moisture content and quantitative PCR (qPCR) analysis were collected in July 2015 from the active layer trough and polygon interior soils at the top 5 cm and bottom 25–30 cm belowground depths. The soil for functional gene amplicon sequencing and qPCR analysis was collected in sterile 50 mL Falcon tubes and immediately frozen at  $-20^\circ\text{C}$ . Soil for nitrogen/ammonia and moisture content was collected in 500 mL Whirl-Pak bags and stored at  $-20^\circ\text{C}$ .

### Gas flux measurements, flux calculation and statistics

The *in situ*  $\text{N}_2\text{O}$  soil gas flux was measured using a static chamber system (Collier et al. 2014) using inverted buckets outfitted with rubber stoppers for gas sampling, at both the trough and polygon interior soils. Gas flux measurements were performed in the summer of 2015. The buckets were placed over bare, non-vegetated soils. Four replicates were collected for each soil type (at two separate polygons/troughs and over two consecutive days) over an 8 h period. The gas samples were collected in 20 mL evacuated glass vials and brought back to the laboratory to be analyzed by greenhouse gas analyzer GC 450 (Bruker, Germany). Each sample was simultaneously injected onto an electron capture detector (ECD), thermal conductivity detector and flame ionization detector. The  $\text{N}_2\text{O}$  was analyzed on the ECD with argon as the carrier gas. The detection limit for on the GC is 0.1  $\text{N}_2\text{O}$  ppm. The concentration of  $\text{N}_2\text{O}$  vs time was plotted and a linear regression with four time points in the time series of concentrations was used to calculate the slope (Collier et al. 2014). The slope of the regression was then used to calculate the  $\text{N}_2\text{O}$  flux for each replicate (Collier et al. 2014). A two-tailed t-test was used to check for significance between the trough and polygon interior soil fluxes.

### $\text{NO}_3^- + \text{NO}_2^-$ , $\text{NH}_4^+$ and soil moisture measurements

Soils collected for soil moisture,  $\text{NO}_3^- + \text{NO}_2^-$ , and  $\text{NH}_4^+$  measurements were placed in Whirlpack bags and kept frozen at  $-20^\circ\text{C}$  during transportation. Soil moisture was measured in triplicate using ~5 g of soil dried overnight in an oven at  $105^\circ\text{C}$ . The  $\text{NO}_3^- + \text{NO}_2^-$  and  $\text{NH}_4^+$  measurements were performed in triplicate. First, 2 M KCl was added to the soils and shaken for 30 min, supernatant was then filtered and measured for extractable nitrogen ( $\text{NO}_3^- + \text{NO}_2^-$ , and  $\text{NH}_4^+$ ). The  $\text{NO}_3^- + \text{NO}_2^-$  content was measured by colorimetry on a Flow Injection analyzer at 520 nm using a copperized cadmium column. The  $\text{NH}_4^+$  content was measured by colorimetry on a Flow Injection analyzer using the sodium salicylate method at 660 nm.

### DNA and RNA isolation and sequencing

The RNA for metatranscriptome sequencing was isolated using the MoBio RNA Power Soil Total RNA Isolation Kit with 15 g of soil. The total RNA was used to generate Illumina TruSeq libraries (part of this standard library preparation involves reverse transcription to cDNA) and metatranscriptome sequencing was performed on an Illumina MiSeq sequencer on a V3 reagent cartridge with 150 cycles, generating single 150 bp reads. The DNA for qPCR, and 16S rRNA and functional gene sequencing was isolated using the MoBio Power Soil DNA Isolation kit with 2 g of soil. Paired end sequencing of the *nirS* and *nifH* genes in triplicate biological replicates for each soil type ( $n = 12$  per gene; trough soil at 5cm, polygon interior soil at 5 cm, trough soil at 25 cm and polygon interior soil at 25 cm) was performed by generating Illumina Nextera libraries using the V2 chemistry and sequencing on an Illumina MiSeq sequencer with 500 cycles. The *nifH* gene was chosen since it is the most widely used marker gene to identify nitrogen-fixing organisms (Gaby and Buckley 2012). Though both *nirS* and *nirK* are often used to assess the denitrifying microbial community, we focused on *nirS*, since *nirK* was shown to be of a much lower (~1000×) abundance in Arctic soils compared with *nirS* (Palmer, Biasi and Horn 2012). Primers and annealing temperature used for amplicon preparation are summarized in supplementary Table S1 available online. All sequencing data was deposited to GenBank under BioProject PRJNA421174.

### qPCR analysis and statistics

Quantitative PCR of the *nirS* and 16S rRNA genes was performed using iQ SYBR Green Supermix from BioRad using the manufacturer's specifications. The qPCR was performed with DNA extracted from the top 5 cm of the soil (top) and soil at 25–30 cm (bottom) of the trough and polygon interior soils in triplicate. This resulted in a total of four soil types; trough top 5 cm; polygon interior top 5 cm; trough bottom 25–30 cm; polygon interior bottom 25–30 cm, done in triplicate ( $n = 12$ ). qPCR was performed on three biological replicates per soil type with three total technical replicates per biological replicate. The qPCRs were performed on the BioRad iQ5 Multicolour qPCR Detection System and the CT values were acquired. The cyclor program used was 3 min at  $95.0^\circ\text{C}$ , followed by  $40 \times$  of 10 s at  $95.0^\circ\text{C}$ ; 45 s at  $54.0^\circ\text{C}$ ; 45 s at  $72.0^\circ\text{C}$ . The melt curve protocol included increasing the temperature by  $0.5^\circ\text{C}$  every 30 s from  $55.0$ – $95.0^\circ\text{C}$  and was run following the amplification protocol to check for fidelity of the primers and ensure that only one product was produced during the amplification. Analysis of the qPCR data included first normalizing the target gene *nirS* to the 16S rRNA gene in each

sample to control for DNA quality and quantity, thus producing the  $\Delta$ CT (delta cycle threshold) values (Livak and Schmittgen 2001). The CT used was an average of the three technical replicates for each sample. We then used the CT value of the trough soil at 5 cm to calculate the relative changes in gene abundance between all the soil types, via the standard  $2^{-\Delta\Delta$ CT method (Livak and Schmittgen 2001). This approach does not provide the total gene copy numbers of the target genes in the soil, rather it is a method to more accurately identify any relative differences in the amount of each target gene between the soil samples. Two-way ANOVA (supplementary Table S2 available online) was used to check if depth of soil sampling (5 cm vs 25–30 cm) or the location of the soil (trough vs polygon interior) had a statistically significant effect on *nirS* gene abundance in the soil, following this, two-tailed t-tests were performed between each soil sample type to test which soil location was statistically different in *nirS* abundance.

### Bioinformatics and statistical analysis of sequencing data

For functional (*nirS*, *nifH*) targeted-amplicon sequencing the raw reads were analyzed using the CLC Genomics Workbench software with the Microbial Genomics Module plugin (Qiagen, Denmark). Quality and chimera filtering was done using default settings, operational taxonomic units (OTUs) clustering and taxonomic assignment were done using custom databases constructed from the FunGene functional gene database repository (<http://fungene.cme.msu.edu/>) (Fish et al. 2013) for the *nifH* and *nirS* genes (clustered at 90%, see Palmer, Biasi and Horn 2012), on fixed length trimmed sequences (390 bp for *nirS*, 390 bp for *nifH*). The closest uncultured and cultured relatives of OTU representatives were determined using BLAST for those OTU that were not able to cluster with cultured organisms from the databases (Altschul et al. 1990; Wheeler et al. 2007). PERMANOVA analysis was performed using CLC Genomics Workbench to assess whether soil depth (top 5 cm vs bottom 25 cm) or soil type (polygon interior vs trough soils) had a significant effect on microbial community composition. Alpha and Beta diversity was measured using Shannon and Bray-Curtis models, respectively, and the Bray-Curtis transformed data were used to perform principal component analysis (PCA) of the functional *nifH* and *nirS* genes, distance matrix and PCA plots were then generated using the Microbial Genomics Module of the CLC Genomics Workbench version 10.1.1.

Metatranscriptomic analysis of the raw reads was performed using the Meta Genome Rapid Annotation (MG-RAST) pipeline. The raw reads were quality controlled, filtered for artificial duplicates and annotated using the MG-RAST (Meyer et al. 2008). For the MG-RAST pipeline the raw sequences were uploaded, the pipeline options were left as default, low quality bases were trimmed, artificial replicate sequences removed, sequences with more than five ambiguous bases were filtered. SEED subsystems were used to produce the hierarchical functional annotations (Overbeek et al. 2014). Organismal annotations were made using the MG-RAST and the SSU database; the taxonomy is assigned based on ribosome-encoding genes from the SILVA database (Keegan et al. 2016) (Quast et al. 2013)). All metatranscriptome sequence data have been deposited to GenBank under Bioproject PRJNA421174.

### Phylogenetic analysis

Alignment of the amplicon *nirS* sequences was performed using the ClustalW algorithm in MEGA software version 7.0 (Kumar,

Stecher and Tamura 2016) with manual refinement of the alignments. The unrooted phylogenetic tree was constructed using the Maximum-likelihood statistical method based on the Tamura-Nei mode with 1000 Bootstrap replicates. The phylogenetic tree was then visualized using FigTree 1.4.3 (Rambaut 2012).

## RESULTS AND DISCUSSION

### N<sub>2</sub>O gas flux, soil NO<sub>3</sub><sup>-</sup> + NO<sub>2</sub><sup>-</sup>, NH<sub>4</sub><sup>+</sup> and moisture content

At the ice-wedge polygon site on AHI, the N<sub>2</sub>O gas flux at the trough soils overlaying ice-wedges was higher than in the interior of the raised polygon soils ( $P = 0.053$ ); the flux was measured to be  $0.291 (\pm 0.086)$  mg N<sub>2</sub>O m<sup>-2</sup> day<sup>-1</sup> at the troughs and  $0.121 (\pm 0.16)$  mg N<sub>2</sub>O m<sup>-2</sup> day<sup>-1</sup> in the polygon interiors (Fig. 1). The content of NO<sub>3</sub><sup>-</sup> + NO<sub>2</sub><sup>-</sup> and NH<sub>4</sub><sup>+</sup> as well as soil moisture of the polygon interior and trough soils is summarized in Table 1. The *in situ* measurements of N<sub>2</sub>O gas flux in other parts of the Arctic and in laboratory experiments suggest that denitrification and release of N<sub>2</sub>O are occurring in Arctic permafrost affected soils and such flux has the potential to increase with permafrost thaw (Rodionow et al. 2006; Elberling, Christiansen and Hansen 2010; Marushchak et al. 2011; Brummell et al. 2014). The majority of Arctic N<sub>2</sub>O soil flux studies have concentrated on organic and peat soils; however, the flux at our mineral AHI ice-wedge polygon site is comparable (Marushchak et al. 2011; Palmer, Biasi and Horn 2012; Li et al. 2016; Voigt et al. 2016; Taş et al. 2018). Together, laboratory and field studies demonstrate that several factors such as vegetation, topography, sunlight, temperature, electron donor availability, carbon content, water content, freeze-thaw cycles and cryoturbation govern N<sub>2</sub>O emissions from these Arctic soils (Repo et al. 2009; Elberling, Christiansen and Hansen 2010; Marushchak et al. 2011; Palmer, Biasi and Horn 2012; Stewart et al. 2014; Li et al. 2016; Voigt et al. 2016). Marushchak et al. (2011) demonstrated that N<sub>2</sub>O emissions are occurring from Arctic peat permafrost soils in Russia and Finland, with the non-vegetated peat soils having much higher N<sub>2</sub>O emissions ( $10.3\text{--}1.08$  mg N<sub>2</sub>O m<sup>-2</sup> day<sup>-1</sup>) compared with the vegetated soils that had negligible N<sub>2</sub>O releases; however, the authors did not detect N<sub>2</sub>O flux from non-vegetated mineral soils. This is in contrast to our results, as we were able to detect N<sub>2</sub>O fluxes in bare, non-vegetated mineral soils. Our results are also comparable to N<sub>2</sub>O flux at the Spitsbergen, Svalbard site in the high Arctic, where  $0.17\text{--}0.37$  mg N<sub>2</sub>O m<sup>-2</sup> day<sup>-1</sup> flux was detected from soils in the presence of light, but a much lower flux and in some cases even uptake of N<sub>2</sub>O in the absence of sunlight (Li et al. 2016). Voigt et al. (2016) demonstrated that experimental warming increased N<sub>2</sub>O emissions from vegetated and non-vegetated peat plateaus in the Finnish Lapland, but had negligible effect on N<sub>2</sub>O flux from upland tundra in a discontinuous permafrost zone. In contrast to our acidic mineral cryosols, N<sub>2</sub>O fluxes in three polar deserts with alkaline soils on Ellesmere Island, Canada were more varied and shifted between production and consumption depending on the specific site, and ranged between 0.35 and  $-1.02$  mg N<sub>2</sub>O m<sup>-2</sup> day<sup>-1</sup>, with production of N<sub>2</sub>O occurring not only at the surface of the soils, but throughout the soil profile down to the permafrost table (Brummell et al. 2014). Although N<sub>2</sub>O flux from agricultural and tropical soils has been the focus of most studies, understanding the drivers that govern the flux of N<sub>2</sub>O in polar Arctic soils, both organic peat and mineral, is important for predicting future climate models due to the large size ( $1\ 358\ 000$  km<sup>2</sup>) of Arctic polar deserts (McCann et al. 2016).

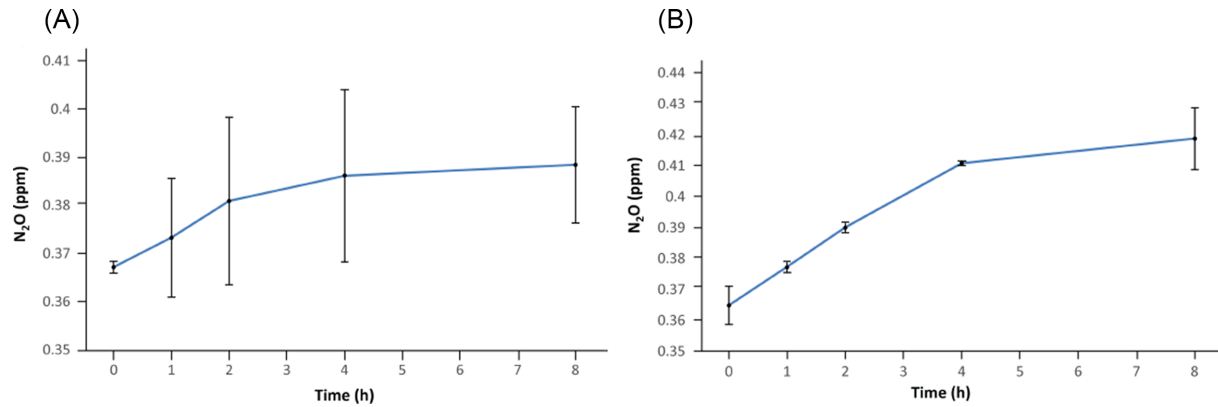

**Figure 1.** In situ gas concentration measurements in a static chamber at polygon interior (A) and trough (B) soils. Four replicates were done for each soils type (at two sites and on two consecutive days). Gas flux was then calculated to be  $0.291 (\pm 0.086) \text{ mg N}_2\text{O m}^{-2} \text{ day}^{-1}$  [ $0.0012 (\pm 0.0036) \text{ mg N}_2\text{O m}^{-2} \text{ h}^{-1}$ ] in wetter trough soils, and  $0.121 (\pm 0.16) \text{ mg N}_2\text{O m}^{-2} \text{ day}^{-1}$  [ $0.0050 (\pm 0.0067) \text{ mg N}_2\text{O m}^{-2} \text{ h}^{-1}$ ] in the polygon interior soils. Error bars represent standard error of the mean (SEM).

**Table 1.** The content of  $\text{NO}_3^- + \text{NO}_2^-$  and  $\text{NH}_4^+$  as well as soil moisture of the polygon interior and trough soils at 5 cm and 25–30 cm. BDL denotes measurements below the detection limit of  $>0.7 \text{ mg kg}^{-1}$ . Standard deviation (SD) is given in brackets.

| Soil type                          | N $\text{mg kg}^{-1}$ dry soil as $\text{NO}_3^- + \text{NO}_2^-$ | N $\text{mg kg}^{-1}$ dry soil as $\text{NH}_4^+$ | % soil moisture content |
|------------------------------------|-------------------------------------------------------------------|---------------------------------------------------|-------------------------|
| Top 5 cm trough soil               | BDL                                                               | 2.572 ( $\pm 0.294$ )                             | 35.5 ( $\pm 6.6$ )      |
| Top 5 cm polygon interior soil     | BDL                                                               | 2.173 ( $\pm 0.301$ )                             | 13.0 ( $\pm 1.6$ )      |
| Bottom 25 cm trough soil           | 3.440 ( $\pm 0.133$ )                                             | 1.182 ( $\pm 0.143$ )                             | 18.8 ( $\pm 0.29$ )     |
| Bottom 25 cm polygon interior soil | 0.791*                                                            | 1.435 ( $\pm 0.052$ )                             | 16.2 ( $\pm 3.5$ )      |

\*SD could not be calculated, as only one replicate was above the detection limit of  $0.7 \text{ mg kg}^{-1} \text{ NO}_3^- + \text{NO}_2^-$ .

### qPCR

qPCR was used to measure the relative differences in the denitrification gene abundance between the two soils types, the polygon interior active layer soil and the trough active layer soils at depths of 5 cm and 25–30 cm. qPCR of the *nirS* genes showed that the trough soils overall had a higher relative abundance of the gene compared with the polygon interior soils, though significance was only detected in the top 5 cm soil samples (Fig. 2). The qPCR and ANOVA analysis (supplementary Table S2 available online) determined that the soil location ( $P = 0.005$ ; trough vs polygon interior) had a significant effect on relative *nirS* abundance, but not soil depth ( $P = 0.107$ ). These results coincide with the higher ( $P = 0.053$ ) flux of  $\text{N}_2\text{O}$  that we observed from the trough soils compared with the polygon interior soils. Furthermore, the trough soils appear to contain higher amounts of nitrogen as  $\text{NO}_3^- + \text{NO}_2^-$ , though only in the deeper (25–30 cm) soils (Table 1). This is consistent with current knowledge that higher levels of nitrate are known to stimulate denitrification and subsequent  $\text{N}_2\text{O}$  releases (Yu et al. 2000; Kemp and Dodds 2002) and that higher abundance of denitrification genes correlates with higher rates of denitrification (Dong et al. 2009). Together with the gas flux data, these results suggest that  $\text{N}_2\text{O}$  generation is occurring primarily in the top 5 cm of the trough soils at the ice-wedge polygon terrain.

### Community structure of potential denitrifiers and nitrogen-fixing bacteria

We analyzed the community composition of potential denitrifiers and nitrogen-fixers in the microbial community of the polygon interior and trough soils at the ice-wedge polygon site via amplicon sequencing of two marker genes, *nirS* and *nifH*. In

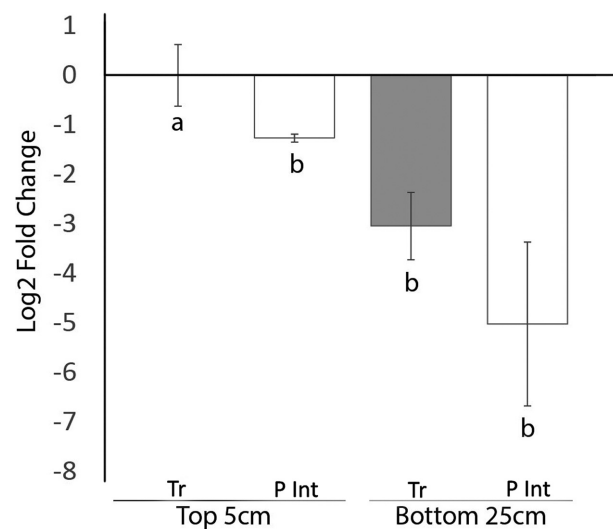

**Figure 2.** qPCR of denitrification genes *nirS* in trough soils (Tr) and polygon interior soils (P Int), at top 5cm and bottom 25–30 cm. Gene quantification is represented as fold-change relative to trough soil at 5 cm. All gene abundances are relative to 16S rRNA genes to control for quality and quantity of DNA extractions. Error bars represent SEM. Letters represent statistically different gene abundances between the soils.

addition, we looked at the functionally active microbial community by analyzing the nitrogen cycling gene transcripts and 16S rRNA transcript sequences in the polygon interior and trough soil metatranscriptomes.

### Denitrifying community

Based on targeted gene sequencing of the *nirS* denitrification gene marker, the microbial community was distinct at the different depths and between soil types (Figs 3 and 4, and supplementary Fig. S2 available online). A total of only 10 *nirS* OTUs were recovered between all the samples. Unique OTUs were recovered from the deeper soils compared with their top soil counterparts (Fig. 3). The majority of the recovered OTUs did not cluster with *nirS* genes from known cultured organisms (Table 2). PERMANOVA analysis of the OTU abundance tables determined that both depth ( $P = 0.010$ ) and soil location ( $P = 0.002$ ) had a significant impact on the diversity of the *nirS* containing denitrifying microbial community. PCA was performed on the *nirS* OTU abundance table, with the first three principal components accounting for 89% of the variation between the samples and replicates. The PCA grouped the polygon interior *nirS*-containing denitrifying community together (supplementary Fig. S2 available online), with the interior polygon soils and replicates clustering together by depth. The top trough soil replicates also clustered together and separately from the polygon interior soils. However, the deeper trough soils did not appear to cluster together (supplementary Fig. S2 available online). Both the 25–30 cm and the top 5 cm soils of the trough had high abundances of OTU 6, OTU 3 and OTU 2, which were closely related to uncultured denitrifiers detected in the Tibetan Plateau (Xie *et al.* 2014), Finish fen soil (Palmer and Horn 2015) and rice paddy fields in Tokyo, Japan (Yoshida *et al.* 2009), respectively (Table 2). Furthermore, many of the denitrifying microbial members were also recovered in both trough and polygon interior soil metatranscriptomes (supplementary Tables S3 and S4 available online). The protein coding and 16S rRNA transcript sequences in the metatranscriptomes were related to known denitrifying bacteria, including members of the genera *Thiobacillus*, *Denitrovibrio*, *Pseudomonas*, *Azospirillum* and *Azorhizobium*, were detected in both trough and polygon interior soils. Different denitrifier communities have previously been linked to differential  $N_2O$  emissions from soils in discontinuous permafrost Arctic peat soils of Russia (Palmer, Biasi and Horn 2012). Palmer, Biasi and Horn (2012) is one of the few other surveys of denitrifiers in Arctic soils; the study looked at the phylogenetic diversity of the *nirS* gene in Arctic peat soils that were affected and not affected by cryoturbation. The authors found that the cryoturbated soils emitting  $N_2O$  in laboratory microcosms had distinct communities of denitrifiers compared with the unturbated soils that were not producing  $N_2O$  (Palmer, Biasi and Horn 2012). Many of the OTUs recovered from the soils were closely related to uncultured bacteria (Palmer, Biasi and Horn 2012). Our findings suggest that this is a similar case in situ at the ice-wedge polygon site: the community of denitrifying bacteria were distinct between the trough soil that appears to have a higher  $N_2O$  flux in situ and the drier polygon interior soils, which had lower  $N_2O$  flux. Furthermore, phylogenetic analysis of *nirS* OTUs demonstrates that much of the denitrifying community at the ice-wedge polygon site are currently uncultured bacteria that are phylogenetically distinct from cultured denitrifiers (Fig. 4). In contrast to our study, a long-term fertilization, warming and water addition experiment in Alexandra Fiord, Nunavut, did not show increases in  $N_2O$  production in wetter plots, nor did the authors observe diversity of *nosZ* (another functional marker of denitrification) between plots (Lamb *et al.* 2011).

### Nitrogen-fixing community

High-throughput amplicon sequencing of the nitrogenase (*nifH*) genes in the top 5 cm and bottom 25–30 cm of the polygon interior and trough soils revealed distinct *nifH*-containing microbial communities between the soil types (Fig. 5). A total of

127 distinct OTUs were recovered between all the samples. PERMANOVA analysis demonstrated that soil location significantly influenced the taxonomic distribution of the potential nitrogen-fixing microbial community ( $P = 0.002$ ), but soil depth did not ( $P = 0.183$ ). The PCA analysis was performed on the *nifH* OTU abundance table, with the first three principal components accounting for 93% of the variation between the samples and replicates. The PCA grouped the polygon interior soil nitrogen-fixing community together regardless of depth (supplementary Fig. S3 available online), with all the interior polygon soils and replicates clustering together. However, the trough soil replicates clustered together based on depth and were separate from the interior soils (supplementary Fig. S3 available online). Polygon interior soils at both depths were dominated by Rhizobiales, though there was also a presence of Chromatiales (Fig. 5). Rhizobiales sequences were also present at both soil depths in troughs, but were relatively less abundant overall (Fig. 5). The trough soils at both depths also contained *nifH* sequences belonging to Gallionelales, Desulfuromonadales and Desulfobacteriales classes. Furthermore, majority of the microbial orders recovered from the targeted amplicon functional gene sequencing of *nifH* were also present in both soil metatranscriptomes (supplementary Tables S3 and S4 available online). Both protein coding and 16S rRNA transcripts related to known free-living nitrogen-fixing genera such as *Azotobacter*, *Beijerinckia* and *Nostoc* were also detected in both trough and polygon interior soil metatranscriptomes, as well as the symbiotic nitrogen-fixing genera *Frankia*, *Azorhizobium*, *Bradyrhizobium* and *Rhizobium*. This supports the notion that high Arctic polar desert cryosols may support an active community of nitrogen-fixing bacteria. There have been few surveys of the *nifH* containing microbial communities in the Arctic overall and fewer still in Arctic soils. Cyanobacteria, such as *Nostoc commune*, have previously been found to be the dominant nitrogen-fixers on Devon Island (high Arctic), although this work was done in salt marches, meadows and hummocks (Chapin, Bliss and Bledsoe 1991). The authors found that soil moisture and temperature were the prominent controlling factors for nitrogen-fixation (estimated from acetylene reduction rates), more so than nitrogen and phosphorus content (Chapin, Bliss and Bledsoe 1991). A limited survey of *nifH* genes in Arctic soil of Cambridge Bay, Canada, revealed *nifH* genes related to Alphaproteobacteria, Gammaproteobacteria and Deltaproteobacteria/Spirochaetae groups, and OTUs belonging to an uncultured clone cluster (Izquierdo and Nüsslein 2006). The authors also surveyed tropical and temperate soils, but only found *nifH* genes belonging to few microbial clades, suggesting that the clone sequencing likely did not capture the full diversity of the nitrogen-fixers (Izquierdo and Nüsslein 2006). Next generation sequencing data from our study suggests a much greater diversity of *nifH*-containing microbial community in Arctic soils compared with previous surveys. A survey in the lowlands near Alexandra Fiord, Ellesmere Island, using terminal restriction fragment length polymorphism analysis, identified Alphaproteobacteria as the most common microbial members containing the *nifH* gene (Deslippe, Egger and Henry 2005). In addition, *nifH*-containing members of the Betaproteobacteria and Cyanobacteria (Nostocales), along with several unidentified taxa, were also present in the soils (Deslippe, Egger and Henry 2005). Though our study demonstrates unique *nifH* containing microbial communities between the different soil location of the ice-wedge polygon site, this may not have any effect on nitrogenase activity and nitrogen-fixing potential of the soil, as previous studies in Arctic soils demonstrated a lack of correlation between changes in the taxonomic

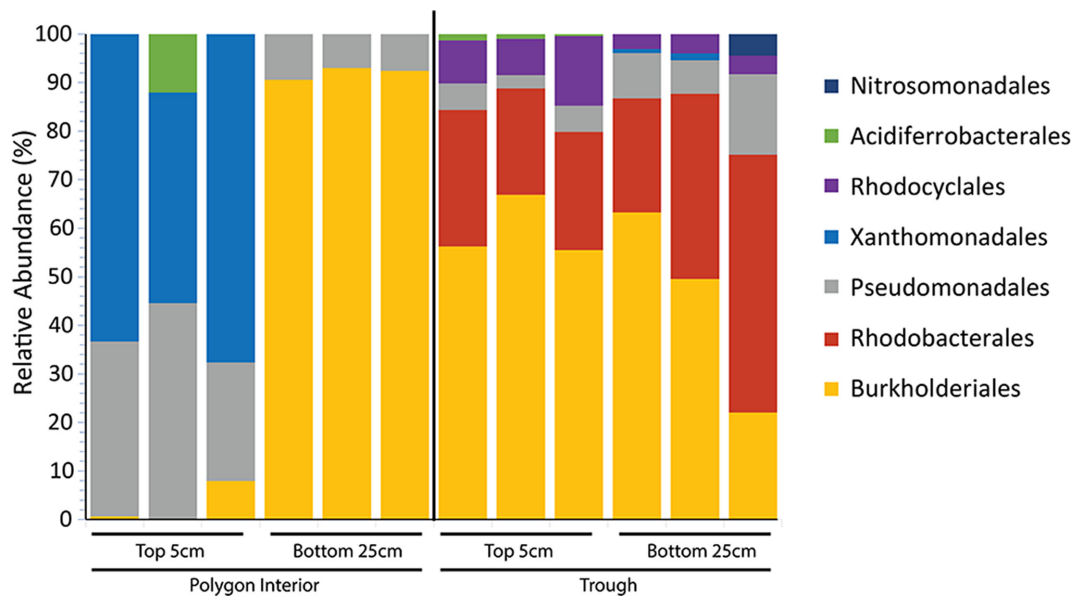

Figure 3. Microbial composition of the *nirS* containing community at the Order level recovered from the functional gene sequencing of denitrification *nirS* gene in the trough soils and polygon interior soils at 5 cm and 25–30 cm. Family assignment was based on closest cultured organism.

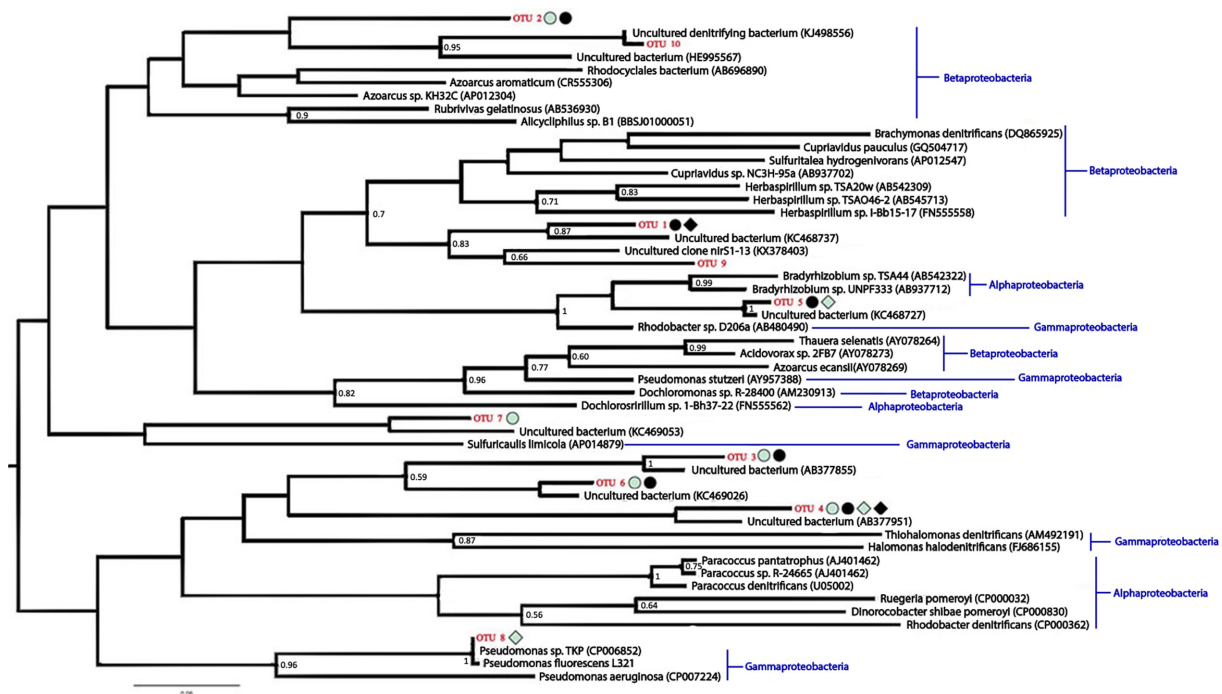

Figure 4. Phylogenetic reconstruction of the *nirS* gene including the OTUs recovered from the study and their closest cultured and uncultured NCBI matches. The shapes beside the OTU names indicate OTUs that were present in at least two of the three replicates from each soil type. Light shapes denote that the OTU was present in the top 5 cm of the soils, while dark shapes denote deeper soils. Circles denote OTUs that were present in trough soils, while squares denote polygon interior soils. The numbers at branch nodes denote portion of replicate trees in which the taxa clustered together in the bootstrap test (1000 replicates); only bootstrap values over 0.5 are shown. The tree is unrooted.

composition of the nitrogen-fixing community and nitrogenase activity in the soils (Deslippe, Egger and Henry 2005). Nitrogenase activity assays would be the next logical step in understanding the effects of the microbial community and abiotic factors such as temperature and moisture content on the nitrogen-fixing potential of the soils at the ice-wedge polygon terrain. This was previously demonstrated by Stewart *et al.* (2011) in a low arctic ecosystem, who reported higher nitrogen-fixation rates in

biological soil crusts that had higher moisture content (Stewart, Coxson and Siciliano 2011b). Overall, moisture content has been shown to be one of the most important factors in controlling nitrogen-fixation rates in Arctic ecosystems (Zielke *et al.* 2002).

### Metatranscriptomics

Metatranscriptome sequencing and analysis was performed on the top 5 cm of the polygon interior and trough soils. Though

**Table 2.** The OTUs recovered in the amplicon sequencing of the *nirS* gene in the trough and polygon interior soils.

| OTU number | Closest NCBI BLAST match                                 | Closest NCBI match ID | % match | Location of the uncultured strain            | Reference of the match              | Closest cultured NCBI match | % match | Name                                      | Reference of the cultured match     |
|------------|----------------------------------------------------------|-----------------------|---------|----------------------------------------------|-------------------------------------|-----------------------------|---------|-------------------------------------------|-------------------------------------|
| 1          | Uncultured bacterium clone F-5-1-33                      | KC468737              | 90      | Qinghai, Tibet Plateau                       | Xie et al. (2014)                   | AB542309                    | 80      | <i>Herbaspirillum</i> sp. TSA20w          | Ishii et al. (2011)                 |
| 2          | Uncultured bacterium                                     | HE995567              | 83      | Fen denitrifier community in Finnish Lapland | Palmer and Horn (2015)              | AB545713                    | 83      | <i>Herbaspirillum</i> sp. TSO46-2         | Unpublished, direct NCBI submission |
| 3          | Uncultured bacterium 518S64                              | AB377855              | 93      | Rice paddy field soil, Tokyo                 | Yoshida et al. (2009)               | AM230903                    | 74      | <i>Paracoccus</i> sp. R-24 665            | Heylen et al. (2006)                |
| 4          | Uncultured bacterium clone 727S039                       | AB377951              | 92      | Rice paddy field soil, Tokyo                 | Yoshida et al. (2009)               | AJ626840                    | 77      | <i>Pseudomonas</i> sp. R125               | Unpublished, direct NCBI submission |
| 5          | Uncultured bacterium clone F-5-1-23                      | KC468727              | 98      | Qinghai, Tibet Plateau                       | Xie et al. (2014)                   | AB480490                    | 88      | <i>Rhodanobacter</i> sp. D206a            | Unpublished, direct NCBI submission |
| 6          | Uncultured bacterium clone F-7-3-177                     | KC469026              | 95      | Qinghai, Tibet Plateau                       | Xie et al. (2014)                   | AB696890                    | 78      | Rhodocyclales bacterium UNPF16            | Unpublished, direct NCBI submission |
| 7          | Uncultured bacterium clone F-7-3-217                     | KC469053              | 92      | Qinghai, Tibet Plateau                       | Xie et al. (2014)                   | AP014879                    | 77      | <i>Sulfuricaulis limicola</i>             | Umezawa et al. (2016)               |
| 8          | <i>Pseudomonas</i> sp. TKP                               | CP006852              | 100     | Isolated from sediments at Kyushu, Japan     | Ohtsubo et al. (2014)               | CP006852                    | 100     | <i>Pseudomonas</i> sp. TKP                | Ohtsubo et al. (2014)               |
| 9          | Uncultured prokaryote clone <i>nirS</i> 1-13             | KX378403              | 88      | N/A                                          | Unpublished, direct NCBI submission | AB937702                    | 88      | <i>Cupriavidus</i> sp. NC3H-95a           | Wei et al. (2015)                   |
| 10         | Uncultured denitrifying bacterium clone J30927555.4.5.T7 | KJ498556              | 99      | Wastewater treatment systems                 | Unpublished, direct NCBI submission | AP012547                    | 78      | <i>Sulfuritalea hydrogenivorans</i> sk43H | Watanabe, Kojima and Fukui (2014)   |

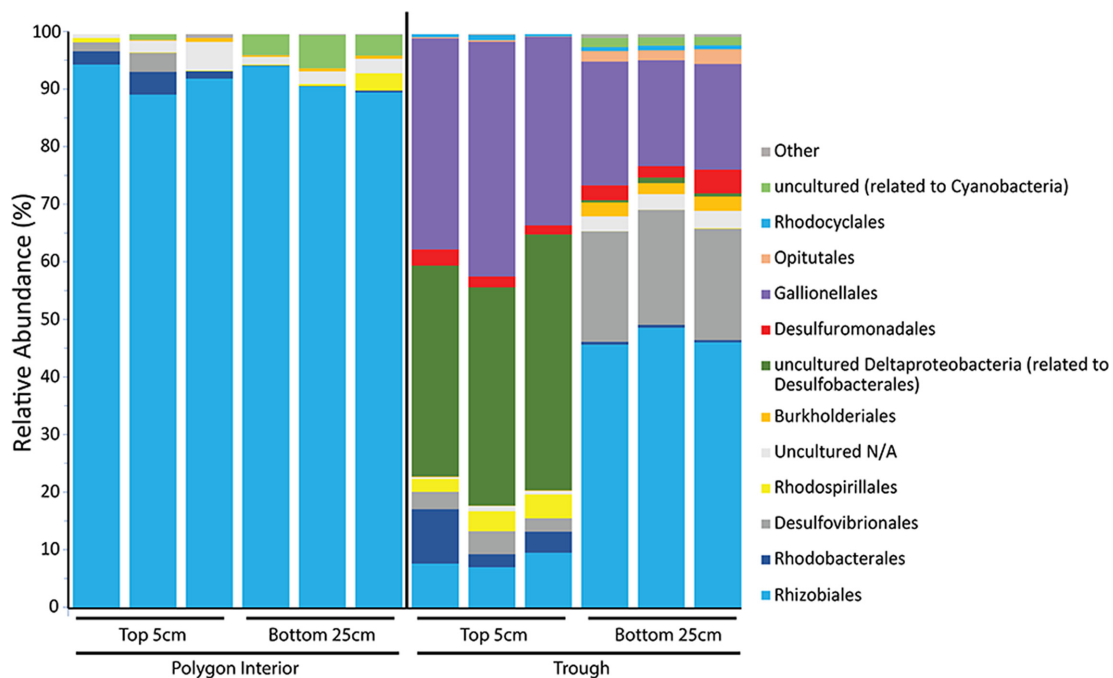**Figure 5.** Microbial composition of nitrogen-fixing *nifH* gene at the Order level in the trough soils and polygon interior soils at 5 cm and 25–30 cm.



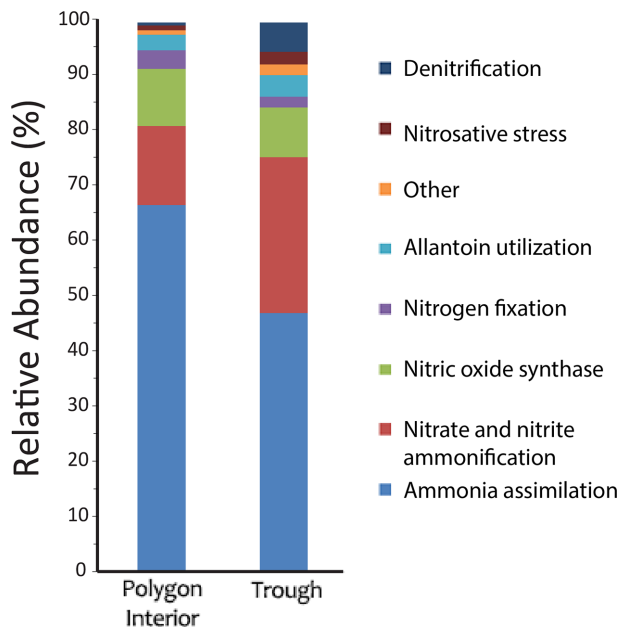

Figure 6. Relative abundance (%) of transcripts involved in the nitrogen cycle in trough and polygon interior top 5 cm soil metatranscriptomes.

transcriptional gene abundances do not always correlate to protein abundances and real activity, both soils showed a presence of gene transcripts involved in the nitrogen cycle, including genes for denitrification, nitrogen-fixation and ammonia utilization and transport (Fig. 6). This indicates that the microbes in these soils are actively producing transcripts of genes that are part of the denitrification and nitrogen-fixing pathways. Specific microbial members that produced RNA transcripts of genes involved in denitrification included *Paracoccus denitrificans*, *Pseudomonas aeruginosa*, *Rhodopseudomonas palustris*, *Bacillus cereus*, *Chloroflexus* sp. and *Sinorhizobium medicae*. Since single-stranded RNA molecules are more susceptible to degradation, higher turnover rate and do not persist in the environment as free molecules like DNA, these results suggest that the ice-wedge polygon soils support an active community of these denitrifying bacteria. This is consistent with previous RNA-based sequencing studies that demonstrated organisms capable of denitrification and nitrogen-fixation are active members of the microbial community in other permafrost affected soils (Tveit, Ulrich and Svenning 2014; Hultman et al. 2015). Transcripts of genes involved in nitrogen-fixation included members of *Nostoc punctiforme*, *Cyanothece* sp., *Rhodobacter sphaeroides*, *Burkholderia xenovorans*, *Azotobacter vinelandii*, *Chlorobium luteolum*, *Anabaena variabilis* and *Halorhodospira halophila*, whereas gene transcripts involved in ammonia utilization and transport belonged to members of *Pedobacter heparinus*, *Candidatus Koribacter versatilis*, *Saccharopolyspora erythraea*, *Candidatus Solibacter usitatus*, *Acidithiobacillus ferrooxidans*, *Chlorobium tepidum* and *Desulfovibrio vulgaris*. Though microbial communities can change annually in Arctic soils (Zinger et al. 2009) and our 2013 transcriptome results may not be directly comparable with our 2015 the soil chemistry, gas fluxes and targeted amplicon sequencing, together our results do suggest that the input of nitrogen into the ecosystem (Salmon et al. 2018) at the site is potentially from a combination of permafrost thaw, which may supply the mineral ammonia and be assimilated by ammonia oxidizers, and through atmospheric nitrogen-fixation by diazotrophs. As temperatures warm

in the Arctic due to climatic change, both sources of nitrogen would potentially increase. With increasing temperatures, the rate of permafrost thaw would increase, potentially further adding sources of nitrogen through decomposition of organic matter (mineralization). Meltwater from permafrost soils contains higher levels of ammonium, which may be utilized by ammonium oxidizing bacteria and further contribute to  $N_2O$  via nitrifier denitrification (Elberling, Christiansen and Hansen 2010). Indeed, ammonium levels and fertilization with ammonium have shown positive correlations to  $N_2O$  release, while levels of  $NO_3^-$  and augmentations with  $NO_3^-$  have not in wetter and lowland Arctic permafrost soils (Ma et al. 2007; Elberling, Christiansen and Hansen 2010), though this is not always the case (Lamb et al. 2011). Previous studies have demonstrated active expression of hydrolases involved in the initial breakdown of complex soil biopolymers in moist Alaskan acidic tundra permafrost (Coolen and Orsi 2015) as well as the presence of active gene transcripts involved in nitrate reduction, denitrification, ammonia uptake and nitrogen-fixation in active layer and permafrost soils of Alaskan bog systems (Hultman et al. 2015), all suggesting that the microbial community in thawing permafrost is primed to utilize the carbon and nitrogen sources that become available with permafrost thaw. The increased carbon availability may further stimulate denitrification rates, as higher carbon has been shown to increase rates of denitrification (Dodds and Jones 1987; Hill and Cardaci 2004; Chen et al. 2018), and the current low carbon content of these cryosols may limit the relative abundance of denitrifiers (Chen et al. 2018); however, this scenario may change with increased permafrost thaw and available carbon. Alternatively, in some upland soils the native dominant denitrifiers are oligotrophic denitrifiers (Hashimoto, Whang and Nagaoka 2006), and it is logical for this to also potentially be true in our mineral upland cryosols; these likely oligotrophic denitrifiers that may be adapted to low carbon environments may not respond positively to increased carbon availability. Furthermore, with the warming temperatures, the activity of nitrogenase would also be increased (Liengen and Olsen 1997; Stewart et al. 2014), providing an additional input of nitrogen into this ecosystem.

## CONCLUSION

The effects of warming temperatures on Arctic soils and nitrogen availability on SOM decomposition rates are complex and involve the interplay responses and feedback loops of microbial populations, plants and microbial grazers, as well as inherent magnitude of SOM stocks and their composition. Our results demonstrate that mineral cryosols of Arctic polar deserts contain an active community potentially capable of denitrification and nitrogen-fixation. Furthermore, we demonstrate that the topology of the land has an effect on the composition of the microbial community and  $N_2O$  flux, with the wetter trough soils having a more prominent flux of  $N_2O$  and a distinct community of denitrifiers and potential nitrogen-fixing bacteria. However, a more extensive survey of different Arctic terrains and soil types are needed to help fully understand the link between the microbial community,  $N_2O$  flux, soil chemistry and moisture content. With the warming temperatures and increased moisture content, nitrogen availability in Arctic soils may potentially increase through increased rates of nitrogenase activity and permafrost thaw. Our results suggest that the active microbial community in these soils is poised to take advantage of these nitrogen inputs into the ecosystem. This may in turn reduce the nitrogen limitation of the entire soil microbial community, resulting

in increased microbial growth, further exasperating the positive feedback loop of GHG emissions and climatic warming.

## SUPPLEMENTARY DATA

Supplementary data are available at [FEMSEC Journal](#) online.

## ACKNOWLEDGEMENTS

This work was supported by the NSERC Discovery (208253), NSERC NRS (208229), Northern Scientific Training Program (204713) and Polar Continental Shelf Program (627–17) grants to LGW. In addition, the work was also supported by the US Department of Energy (DE-SC0004902) to TCO.

**Author contributions:** IA wrote the manuscript and performed gas flux collection, phylogenetic and bioinformatic analysis, and the soil moisture and content analysis. IA and JR performed the soil sample collection and DNA/RNA extractions. IA and AL performed the sequencing library preparation and sequencing. IA, LGW, CG and TCO contributed to conception and editing of the manuscript.

**Conflict of interest.** None declared.

## REFERENCES

- Altschul SF, Gish W, Miller W et al. Basic local alignment search tool. *J Mol Biol* 1990;215:403–10.
- Brummell ME, Farrell RE, Hardy SP et al. Greenhouse gas production and consumption in High Arctic deserts. *Soil Biol Biochem* 2014;68:158–65.
- Butterbach-Bahl K, Baggs EM, Dannenmann M et al. Nitrous oxide emissions from soils: how well do we understand the processes and their controls? *Phil Trans R Soc B* 2013;368:20130122.
- Chapin DM, Bliss L, Bledsoe L. Environmental regulation of nitrogen fixation in a high arctic lowland ecosystem. *Can J Bot* 1991;69:2744–55.
- Chen S, Wang F, Zhang Y et al. Organic carbon availability limiting microbial denitrification in the deep vadose zone. *Environ Microbiol* 2018;20:980–92.
- Collier SM, Ruark MD, Oates LG et al. Measurement of greenhouse gas flux from agricultural soils using static chambers. *J Vis Exp* 2014; 90 :52110.
- Coolen MJ, Orsi WD. The transcriptional response of microbial communities in thawing Alaskan permafrost soils. *Front Microbiol* 2015;6:197.
- Dalal RC, Allen DE. Greenhouse gas fluxes from natural ecosystems. *Aust J Bot* 2008;56:369–407.
- Davidson EA, Kanter D. Inventories and scenarios of nitrous oxide emissions. *Environ Res Lett* 2014;9:105012.
- Deslippe JR, Egger KN, Henry GH. Impacts of warming and fertilization on nitrogen-fixing microbial communities in the Canadian High Arctic. *FEMS Microbiol Ecol* 2005;53:41–50.
- Dodds WK, Jones RD. Potential rates of nitrification and denitrification in an oligotrophic freshwater sediment system. *Microb Ecol* 1987;14:91–100.
- Dong LF, Smith CJ, Papaspyrou S. Changes in benthic denitrification, nitrate ammonification, and anammox process rates and nitrate and nitrite reductase gene abundances along an estuarine nutrient gradient (the Colne estuary, United Kingdom). *Appl. Environ. Microbiol.* 2009;75: 3171–9. 10.1128/AEM.02511-0819304834.
- Drew JV, Tedrow JCF. Arctic soil classification and patterned ground. *Arctic* 1962;15:109–16.
- Elberling B, Christiansen HH, Hansen BU. High nitrous oxide production from thawing permafrost. *Nat Geosci* 2010;3:332–5.
- Finger RA, Turetsky MR, Kielland K et al. Effects of permafrost thaw on nitrogen availability and plant–soil interactions in a boreal Alaskan lowland. *J Ecol* 2016;104:1542–54.
- Fish JA, Chai B, Wang Q et al. FunGene: the functional gene pipeline and repository. *Front Microbiol* 2013;4:291.
- Gaby JC, Buckley DH. A comprehensive evaluation of PCR primers to amplify the nifH gene of nitrogenase. *PLoS One* 2012;7:e42149.
- Gittel A, Bárta J, Kohoutová I et al. Distinct microbial communities associated with buried soils in the Siberian tundra. *ISME J* 2014;8:841–53.
- Graham DE, Wallenstein MD, Vishnivetskaya TA et al. Microbes in thawing permafrost: the unknown variable in the climate change equation. *ISME J* 2012;6:709–12.
- Graversen RG, Mauritsen T, Tjernström M et al. Vertical structure of recent Arctic warming. *Nature* 2008;451:53–6.
- Hashimoto T, Whang K-S, Nagaoka K. A quantitative evaluation and phylogenetic characterization of oligotrophic denitrifying bacteria harbored in subsurface upland soil using improved culturability. *Biol Fertil Soils* 2006;42:179–85.
- Heylen K, Gevers D, Vanparys B et al. The incidence of nirS and nirK and their genetic heterogeneity in cultivated denitrifiers. *Environ Microbiol* 2006;8:2012–21.
- Hill AR, Cardaci M. Denitrification and organic carbon availability in riparian wetland soils and subsurface sediments. *Soil Sci Soc Am J* 2004;68:320–5.
- Hobara S, McCalley C, Koba K et al. Nitrogen fixation in surface soils and vegetation in an Arctic tundra watershed: a key source of atmospheric nitrogen. *Arct Antarct Alp Res* 2006;38:363–72.
- Hugelius G, Strauss J, Zubrzycki S et al. Improved estimates show large circumpolar stocks of permafrost carbon while quantifying substantial uncertainty ranges and identifying remaining data gaps. *Biogeosci Discuss* 2014;11:4771–822.
- Hultman J, Waldrop MP, Mackelprang R et al. Multi-omics of permafrost, active layer and thermokarst bog soil microbiomes. *Nature* 2015;521:208–12.
- Ishii S, Ashida N, Otsuka S et al. Isolation of oligotrophic denitrifiers carrying previously uncharacterized functional gene sequences. *Appl Environ Microbiol* 2011;77:338–42.
- Izquierdo JA, Nüsslein K. Distribution of extensive nifH gene diversity across physical soil microenvironments. *Microb Ecol* 2006;51:441–52.
- Keegan KP, Glass EM, Meyer F MG-RAST, a Metagenomics Service for Analysis of Microbial Community Structure and Function. *Methods Mol. Biol.* 2016;1399:207–33. 10.1007/978-1-4939-3369-3\_1326791506.
- Kemp MJ, Dodds WK. The influence of ammonium, nitrate, and dissolved oxygen concentrations on uptake, nitrification, and denitrification rates associated with prairie stream substrata. *Limnol Oceanogr* 2002;47:1380–93.
- Kumar S, Stecher G, Tamura K. MEGA7: Molecular Evolutionary Genetics Analysis version 7.0 for bigger datasets. *Mol Biol Evol* 2016;33:1870–4.
- Lamb EG, Han S, Lanoil BD et al. A High Arctic soil ecosystem resists long-term environmental manipulations. *Glob Chang Biol* 2011;17:3187–94.
- Lau M, Stackhouse B, Layton A et al. An active atmospheric methane sink in high Arctic mineral cryosols. *ISME J* 2015;9:1880–91.

- Lawrence DM, Slater AG, Romanovsky VE et al. Sensitivity of a model projection of near-surface permafrost degradation to soil column depth and representation of soil organic matter. *J Geophys Res Earth Surf* 2008;113:F02011.
- Liengen T, Olsen RA. Nitrogen fixation by free-living cyanobacteria from different coastal sites in a high arctic tundra, Spitsbergen. *Arct Alp Res* 1997;470–7.
- Li F, Zhu R, Bao T et al. Sunlight stimulates methane uptake and nitrous oxide emission from the High Arctic tundra. *Sci Total Environ* 2016;572:1150–60.
- Livak KJ, Schmittgen TD. Analysis of relative gene expression data using real-time quantitative PCR and the 2<sup>-</sup>ΔΔCT method. *Methods* 2001;25:402–8.
- Marushchak M, Pitkämäki A, Koponen H et al. Hot spots for nitrous oxide emissions found in different types of permafrost peatlands. *Glob Chang Biol* 2011;17:2601–14.
- Mauritz M, Bracho R, Celis G et al. Nonlinear CO<sub>2</sub> flux response to 7 years of experimentally induced permafrost thaw. *Glob Chang Biol* 2017;23:3646–66.
- Ma WK, Schautz A, Fishback L-AE et al. Assessing the potential of ammonia oxidizing bacteria to produce nitrous oxide in soils of a high arctic lowland ecosystem on Devon Island, Canada. *Soil Biol Biochem* 2007;39:2001–13.
- McCann CM, Wade MJ, Gray ND et al. Microbial communities in a High Arctic polar desert landscape. *Front Microbiol* 2016;7:419.
- Meyer F, Paarmann D, D'Souza M et al. The metagenomics RAST server—a public resource for the automatic phylogenetic and functional analysis of metagenomes. *BMC Bioinformatics* 2008;9:386.
- Ohtsubo Y, Kishida K, Sato T et al. Complete genome sequence of *Pseudomonas* sp. strain TKP, isolated from a  $\gamma$ -hexachlorocyclohexane-degrading mixed culture. *Genome Announc* 2014;2:e01241–01213.
- Overbeek R, Olson R, Pusch G et al. The SEED and the Rapid Annotation of microbial genomes using Subsystems Technology (RAST). *Nucleic Acids Res.* 2014; 42:D206–14. 10.1093/nar/gkt122624293654.
- Palmer K, Biasi C, Horn MA. Contrasting denitrifier communities relate to contrasting N<sub>2</sub>O emission patterns from acidic peat soils in arctic tundra. *ISME J* 2012;6:1058–77.
- Palmer K, Horn MA. Denitrification activity of a remarkably diverse fen denitrifier community in Finnish Lapland is N<sub>2</sub>O limited. *PLoS One* 2015;10:e0123123.
- Quast C, Pruesse E, Yilmaz P The SILVA ribosomal RNA gene database project: improved data processing and web-based tools. *Nucleic Acids Res.* 2013;41:D590–6. 10.1093/nar/gks121923193283.
- Rambaut A. FigTree v1.4.3. 2012. <http://tree.bio.eg.ac.uk/software/figtree/> (accessed: December 20, 2018).
- Repo ME, Susiluoto S, Lind SE et al. Large N<sub>2</sub>O emissions from cryoturbated peat soil in tundra. *Nat Geosci* 2009;2:189–92.
- Rodionov A, Flessa H, Kazansky O et al. Organic matter composition and potential trace gas production of permafrost soils in the forest tundra in northern Siberia. *Geoderma* 2006;135:49–62.
- Salmon VG, Schädel C, Bracho R et al. Adding depth to our understanding of nitrogen dynamics in permafrost soils. *J Geophys Res Biogeosci* 2018;123:2497–512.
- Schuur E, McGuire A, Schädel C et al. Climate change and the permafrost carbon feedback. *Nature* 2015;520:171–9.
- Sistla SA, Asao S, Schimel JP. Detecting microbial N-limitation in tussock tundra soil: implications for Arctic soil organic carbon cycling. *Soil Biol Biochem* 2012;55:78–84.
- Šimek M, Cooper J. The influence of soil pH on denitrification: progress towards the understanding of this interaction over the last 50 years. *Eur J Soil Sci* 2002;53:345–54.
- Stackhouse BT, Vishnivetskaya TA, Layton A et al. Effects of simulated spring thaw of permafrost from mineral cryosol on CO<sub>2</sub> emissions and atmospheric CH<sub>4</sub> uptake. *J Geophys Res Biogeosci* 2015;120:1764–84.
- Stewart KJ, Coxson D, Grogan P. Nitrogen inputs by associative cyanobacteria across a low arctic tundra landscape. *Arct Antarct Alp Res* 2011a;43:267–78.
- Stewart KJ, Coxson D, Siciliano S. Small-scale spatial patterns in N<sub>2</sub>-fixation and nutrient availability in an arctic hummock-hollow ecosystem. *Soil Biol Biochem* 2011b;43:133–40.
- Stewart KJ, Grogan P, Coxson DS et al. Topography as a key factor driving atmospheric nitrogen exchanges in arctic terrestrial ecosystems. *Soil Biol Biochem* 2014;70:96–112.
- Tarnocai C, Canadell J, Schuur E et al. Soil organic carbon pools in the northern circumpolar permafrost region. *Global Biogeochem Cycles* 2009;23.
- Taş N, Prestat E, McFarland JW et al. Impact of fire on active layer and permafrost microbial communities and metagenomes in an upland Alaskan boreal forest. *ISME J* 2014;8 :1904–19. 10.1038/ismej.2014.3624722629.
- Taş N, Prestat E, Wang S et al. Landscape topography structures the soil microbiome in arctic polygonal tundra. *Nat Commun* 2018;9:777.
- Tveit A, Urich T, Svenning MM. Metatranscriptomic analysis of Arctic peat soil microbiota. *Appl Environ Microbiol* 2014;80:5761–72.
- Umezawa K, Watanabe T, Miura A et al. The complete genome sequences of sulfur-oxidizing Gammaproteobacteria *Sulfurifastus variabilis* skN76 T and *Sulfuricaulis limicola* HA5 T. *Stand Genomic Sci* 2016;11:71.
- Voigt C, Lamprecht RE, Marushchak ME et al. Warming of subarctic tundra increases emissions of all three important greenhouse gases—carbon dioxide, methane, and nitrous oxide. *Glob Chang Biol* 2016;23:3121–38.
- Voigt C, Marushchak ME, Lamprecht RE et al. Increased nitrous oxide emissions from Arctic peatlands after permafrost thaw. *Proc Natl Acad Sci USA* 2017;201702902.
- Walker D, Gould W, Maier H et al. The Circumpolar Arctic Vegetation Map: AVHRR-derived base maps, environmental controls, and integrated mapping procedures. *Int J Remote Sens* 2002;23:4551–70.
- Watanabe T, Kojima H, Fukui M. Complete genomes of freshwater sulfur oxidizers *Sulfuricella denitrificans* skB26 and *Sulfuritalea hydrogenivorans* sk43H: genetic insights into the sulfur oxidation pathway of betaproteobacteria. *Syst Appl Microbiol* 2014;37:387–95.
- Wei W, Isobe K, Nishizawa T et al. Higher diversity and abundance of denitrifying microorganisms in environments than considered previously. *ISME J* 2015;9:1954–65.
- Wheeler DL, Barrett T, Benson DA et al. Database resources of the national center for biotechnology information. *Nucleic Acids Res* 2007;36:D13–21.
- Xie Z, Le Roux X, Wang C et al. Identifying response groups of soil nitrifiers and denitrifiers to grazing and associated soil environmental drivers in Tibetan alpine meadows. *Soil Biol Biochem* 2014;77:89–99.
- Yergeau E, Hogues H, Whyte L et al. The functional potential of high Arctic permafrost revealed by metagenomic sequencing, qPCR and microarray analyses. *The ISME journal* 2010;4:1206–14.

- Yoshida M, Ishii S, Otsuka S et al. Temporal shifts in diversity and quantity of nirS and nirK in a rice paddy field soil. *Soil Biol Biochem* 2009;**41**:2044–51.
- Yu K, Chen G, Struwe S et al. Production and reduction of nitrous oxide in agricultural and forest soils. *Ying Yong Sheng Tai Xue Bao* 2000;**11**:385–9.
- Zielke M, Ekker AS, Olsen RA et al. The influence of abiotic factors on biological nitrogen fixation in different types of vegetation in the High Arctic, Svalbard. *Arct Antarct Alp Res* 2002;**34**:293–9.
- Zinger L, Shahnava B, Baptist F et al. Microbial diversity in alpine tundra soils correlates with snow cover dynamics. *ISME J* 2009;**3**:850
